# Supplementary material for: Motivation for Rehabilitation in Patients With Subacute Stroke: A Qualitative Study
Source: Frontiers journal article supplement (doi:10.3389/fresc.2021.664758), 2021-06-07
Supplement: Data_Sheet_1.zip [file Sample characteristics.PDF › data sheet/Sample characteristics.PDF]

Sample characteristics (aged < 65 years)

| Sample no.                                         | 1    | 2    | 3    | 4    | 5    | 6    | 7    | 8    | 9    | 10   |
|----------------------------------------------------|------|------|------|------|------|------|------|------|------|------|
| <b>Gender, male/female</b>                         | m    | f    | m    | f    | m    | m    | m    | m    | m    | f    |
| <b>Age</b>                                         | 49   | 62   | 57   | 51   | 42   | 63   | 59   | 55   | 49   | 48   |
| <b>Side of paresis (right/left/bilateral)</b>      | r    | l    | r    | l    | r    | l    | r    | r    | l    | l    |
| <b>Days from stroke onset to interview</b>         | 54   | 37   | 128  | 82   | 79   | 122  | 95   | 78   | 137  | 35   |
| <b>Days from admission to interview</b>            | 29   | 15   | 97   | 46   | 35   | 67   | 58   | 62   | 106  | 18   |
| <b>Total hospitalization days</b>                  | 93   | 20   | 118  | 54   | 143  | 88   | 66   | 118  | 149  | 20   |
| <b>Number of family members living together</b>    | 1    | 1    | 0    | 1    | 3    | 1    | 0    | 0    | 2    | 2    |
| <b>FIM<sup>†</sup> total score</b>                 | 117  | 126  | 117  | 124  | 84   | 110  | 121  | 118  | 93   | 125  |
| <b>FIM<sup>†</sup> motor score</b>                 | 83   | 91   | 83   | 89   | 52   | 82   | 86   | 84   | 64   | 90   |
| <b>MMSE<sup>‡</sup></b>                            | 30   | 30   | 27   | 30   | 27   | 29   | 29   | 30   | 29   | 30   |
| <b>Living place before onset, home/not at home</b> | home |
| <b>Working status before stroke, Yes/No</b>        | Yes  | No   | Yes  |

<sup>†</sup>Functional Independence Measure; <sup>‡</sup>Mini-Mental State Examination.

Sample characteristics (aged  $\geq 65$  years)

| Sample no.                                         | 1    | 2    | 3    | 4    | 5    | 6    | 7    | 8    | 9    | 10   |
|----------------------------------------------------|------|------|------|------|------|------|------|------|------|------|
| <b>Gender, male/female</b>                         | f    | m    | m    | f    | m    | m    | m    | m    | f    | f    |
| <b>Age</b>                                         | 83   | 75   | 75   | 71   | 81   | 80   | 84   | 78   | 77   | 76   |
| <b>Side of paresis (right/left/bilateral)</b>      | l    | l    | l    | l    | b    | r    | l    | r    | r    | r    |
| <b>Days from stroke onset to interview</b>         | 97   | 51   | 58   | 42   | 62   | 86   | 70   | 121  | 98   | 60   |
| <b>Days from admission to interview</b>            | 73   | 27   | 32   | 28   | 30   | 44   | 36   | 102  | 59   | 36   |
| <b>Total hospitalization days</b>                  | 82   | 56   | 41   | 74   | 52   | 54   | 41   | 148  | 96   | 109  |
| <b>Number of family members living together</b>    | 1    | 2    | 1    | 1    | 1    | 1    | 4    | 1    | 0    | 1    |
| <b>FIM<sup>†</sup> total score</b>                 | 116  | 119  | 118  | 110  | 109  | 93   | 87   | 92   | 113  | 108  |
| <b>FIM<sup>†</sup> motor score</b>                 | 81   | 84   | 84   | 82   | 79   | 68   | 70   | 63   | 83   | 72   |
| <b>MMSE<sup>‡</sup></b>                            | 27   | 29   | 28   | 29   | 28   | 25   | 28   | 28   | 30   | 30   |
| <b>Living place before onset, home/not at home</b> | home |
| <b>Working status before stroke, Yes/No</b>        | No   | Yes  | No   | No   | Yes  | No   | No   | No   | Yes  | No   |

<sup>†</sup>Functional Independence Measure; <sup>‡</sup>Mini-Mental State Examination.
